# Supplementary material for: Perfluorodecalin-based oxygenated emulsion as a topical treatment for chemical burn to the eye
Source: PubMed Central journal article supplement (PMC9712419; doi:10.1038/s41467-022-35241-1), 2022-11-30
Supplement: 41467_2022_35241_MOESM1_ESM.pdf [file 41467_2022_35241_MOESM1_ESM.pdf]

1 **SUPPLEMENTARY MATERIALS:**

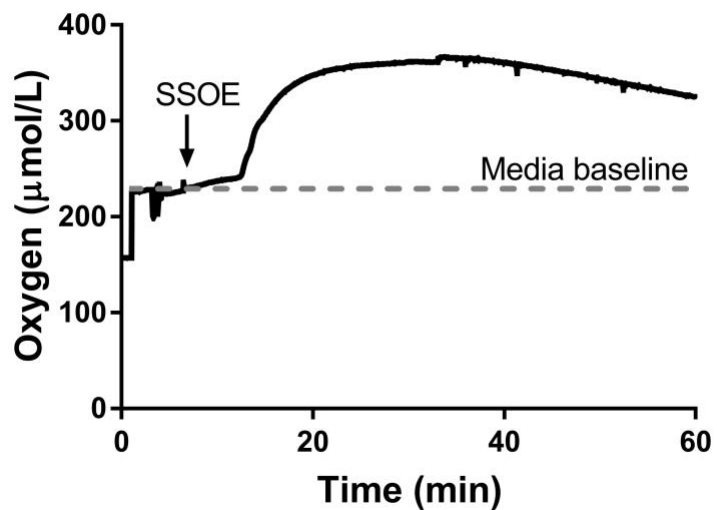

2

3 **Figure S1. Representative oxygen concentration curve after adding SSOE to cell culture media.**

4 Dashed line represents baseline level in culture media alone. Source data are provided as a Source Data

5 file.

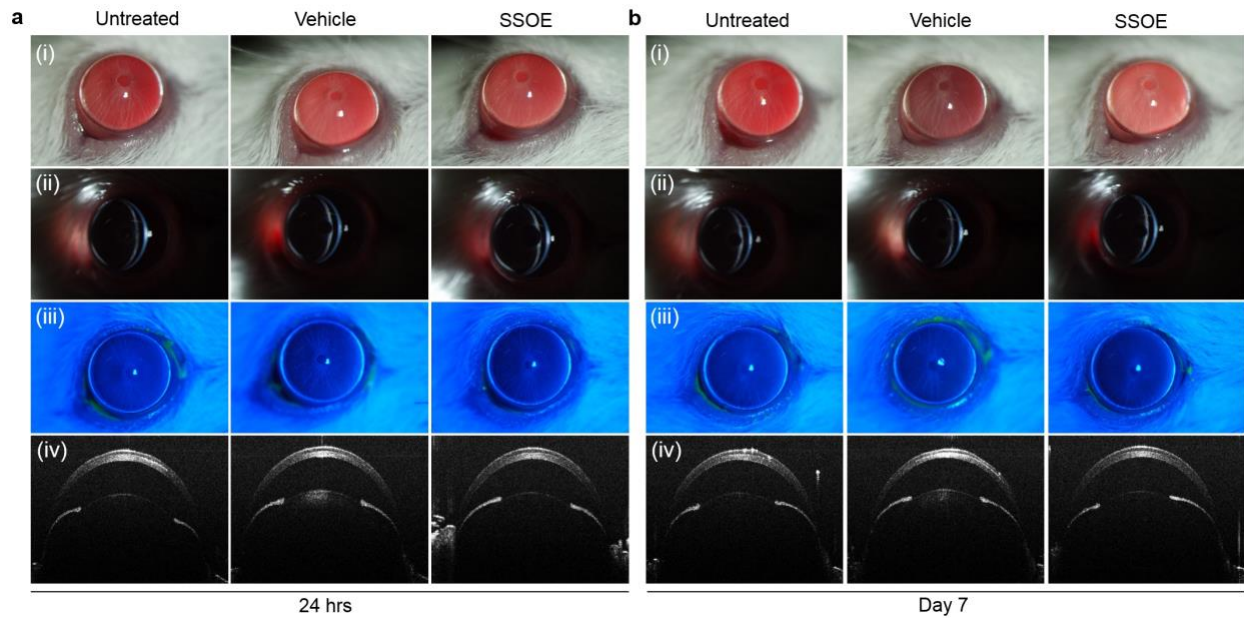

6

7 **Figure S2. No acute or sub-acute ocular toxicity was observed after SSOE application.**

8 SSOE or vehicle were applied to the intact ocular surface of mice for 1 hour, followed by

9 irrigation. Representative slit lamp photography showing no signs of ocular redness, irritation, or

10 inflammation 24 hours (a) and 7 days (b) after application. (i) Broad beam lighting, (ii) slit beam

11 lighting, (iii) fluorescein staining, and (iv) anterior segment-OCT. Data are representative of

12 three independent experiments.

Opacity Score

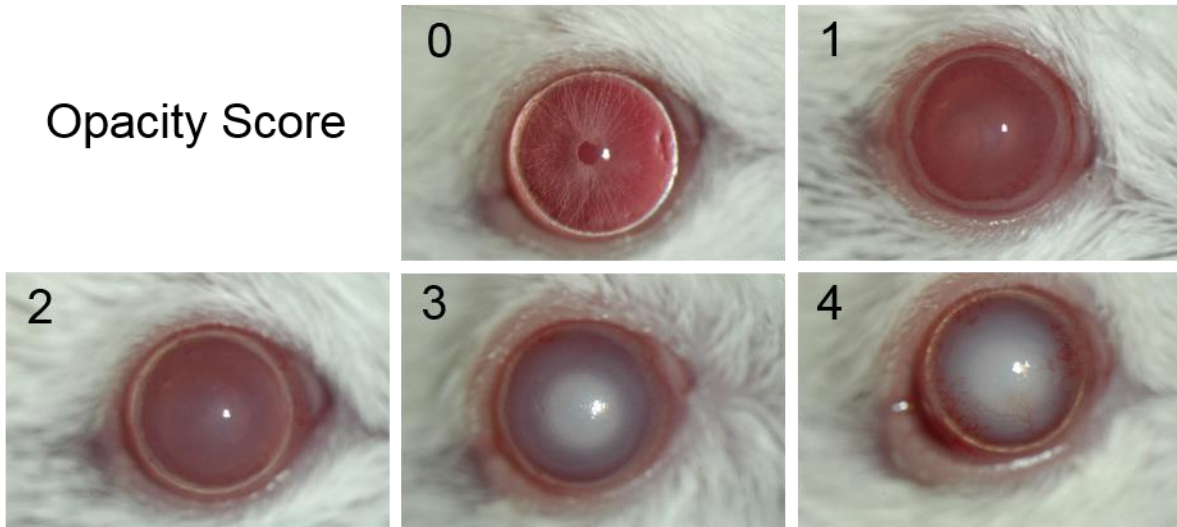

13

14 **Figure S3. The optical opacity was scored 0 to 4 based on these standard photographs.**

| <b>Growth factor</b> | <b>Untreated</b> | <b>SSOE</b> | <b>P value</b> |
|----------------------|------------------|-------------|----------------|
| Amphiregulin         | 0.114            | 0.109       | 0.812          |
| bFGF                 | 1.558            | 1.342       | 0.333          |
| beta-NGF             | 0.273            | 0.282       | 0.889          |
| EGF                  | 0.788            | 0.339       | 0.291          |
| EGFR                 | 0.601            | 0.460       | 0.246          |
| GCSF                 | 0.117            | 0.122       | 0.885          |
| GM-CSF               | 0.402            | 0.415       | 0.891          |
| FGF-7                | 0.529            | 0.575       | 0.756          |
| HGF                  | 0.026            | 0.017       | 0.092          |
| HGFR                 | 0.440            | 0.471       | 0.710          |
| IGFBP-2              | 1.744            | 1.609       | 0.522          |
| IGFBP-3              | 1.765            | 1.629       | 0.690          |
| IGFBP-5              | 0.335            | 0.322       | 0.850          |
| IGFBP-6              | 1.003            | 0.799       | 0.202          |
| IGF-1                | 1.724            | 1.660       | 0.848          |
| IGF-1R               | 0.074            | 0.027       | 0.0387*        |
| IGF-2                | 0.520            | 0.561       | 0.765          |
| IL-2                 | 0.251            | 0.227       | 0.718          |
| IL-7                 | 0.078            | 0.059       | 0.534          |
| M-CSF                | 0.935            | 0.942       | 0.978          |
| PDGF-AA              | 0.603            | 0.739       | 0.421          |
| PDGF-BB              | 0.186            | 0.238       | 0.294          |
| PLGF                 | 0.712            | 0.579       | 0.376          |
| SCF                  | 0.114            | 0.117       | 0.916          |
| TGF beta1            | 0.925            | 0.890       | 0.843          |
| VEGF-A               | 0.210            | 0.192       | 0.736          |
| VEGFR1               | 0.177            | 0.194       | 0.707          |
| VEGFR2               | 0.283            | 0.301       | 0.847          |
| VEGFR3               | 0.299            | 0.350       | 0.706          |
| VEGF-D               | 0.258            | 0.307       | 0.581          |

15 **Figure S4. Expression of growth factors in the anterior segment of the eye after SSOE**  
16 **treatment.** Mouse cornea, conjunctiva, and iris tissues were collected 7 days post-burn and  
17 subjected to growth factor array analysis according to the manufacturer's protocol (RayBiotech,  
18 Peachtree Corners, GA). While the levels of insulin-like growth factor type 1 receptor (IGF-1R,  
19 marked with \*) was significantly decreased by SSOE treatment, all other growth factors tested  
20 showed no significant changes. n = 3 eyes in each group. Statistical significance was determined  
21 using unpaired, two-tailed Student's t-test.

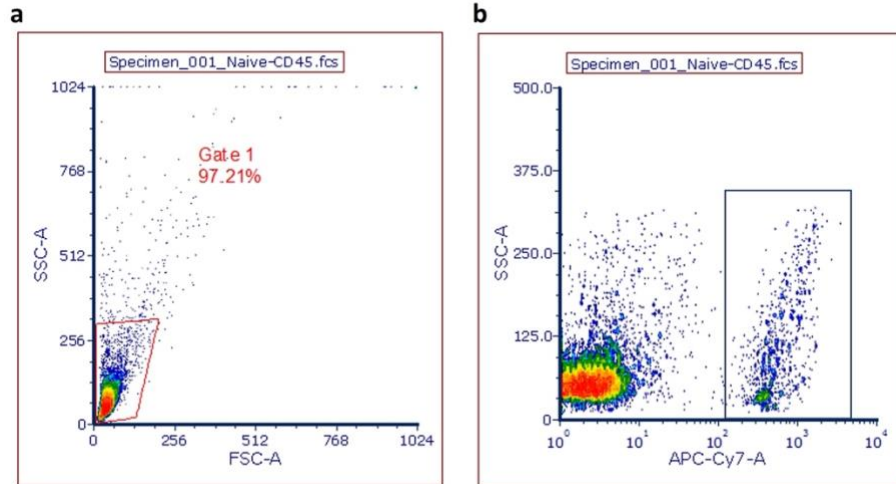

23  
24 **Figure S5. Gating strategies for flow cytometry data analysis. a** SSC vs FCS density plot.  
25 Forward (FSC-A) and side scatter (SSC-A) were adjusted to minimize events on the axes. More  
26 than 90% of total cells were recruited for further gating of the population of CD45 positive cells  
27 **(b).**
